# Supplementary material for: Novel Arabidopsis microtubule-associated proteins track growing microtubule plus ends
Source: PubMed Central journal article supplement (PMC5288973; doi:10.1186/s12870-017-0987-5), 2017-02-02

# Additional file 2: Figure S2

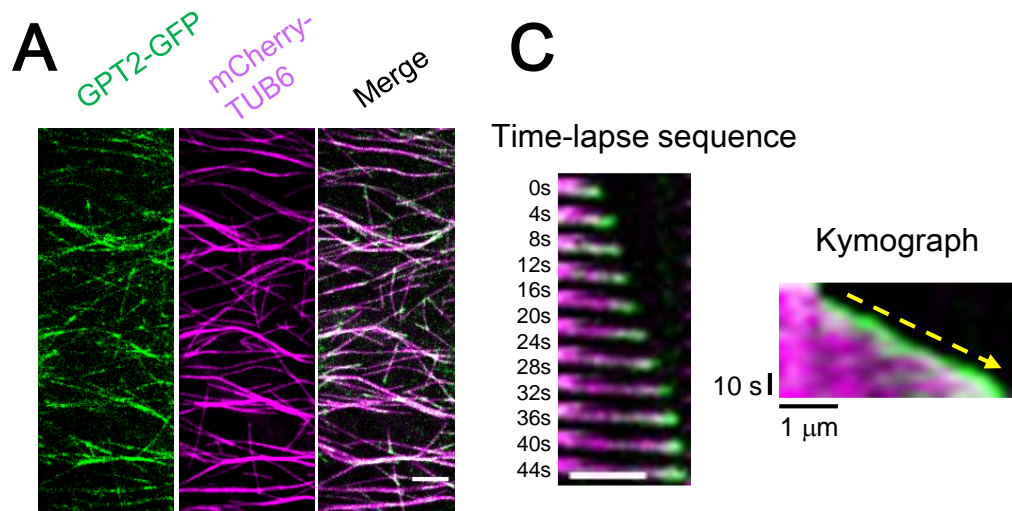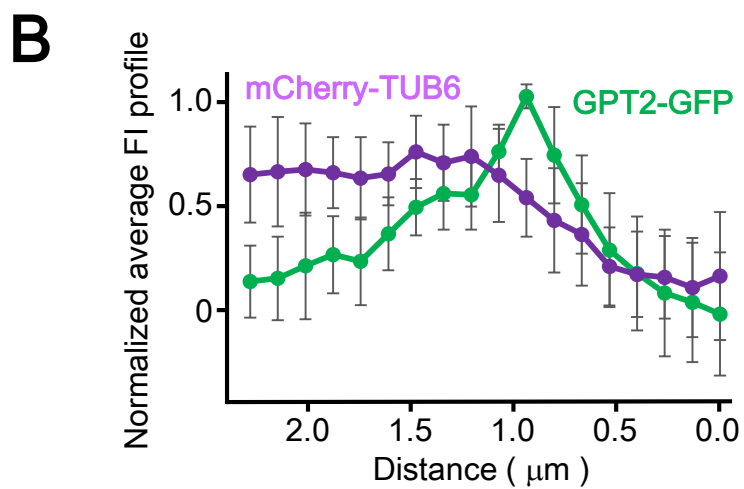

Supplement: 12870_2017_987_MOESM2_ESM.pdf [file 12870_2017_987_MOESM2_ESM.pdf]
