# Supplementary material for: Novel Arabidopsis microtubule-associated proteins track growing microtubule plus ends
Source: PubMed Central journal article supplement (PMC5288973; doi:10.1186/s12870-017-0987-5), 2017-02-02

# Additional file 4: Figure S4

Channel 1:  
EB1-mCherry

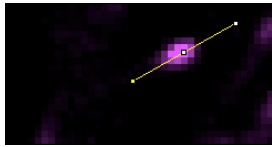

Channel 2:  
GFP-GPT1

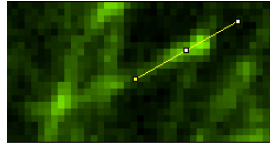

## Line drawing at MT ends

- A straight line was drawn manually on Channel 1 first, then select Edit > Selection > Restore functions in ImageJ
- This will place the identical line on the same position on another channel

Intensity Plot

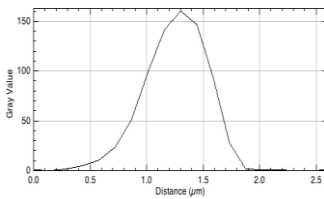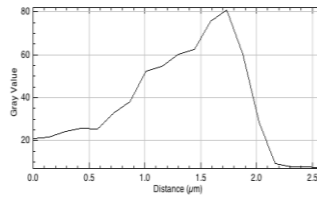

## Intensity plot drawing

- Show relative fluorescent values along the line

Merge

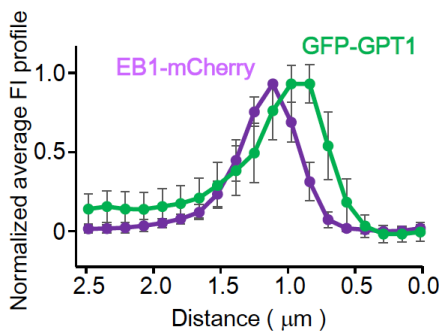

## Merged intensity plots

- Retrieve intensity values at each position from both channels
- Values are normalized with the highest value set to 1.0
- Mean and STDEV values are calculated from 20 particles

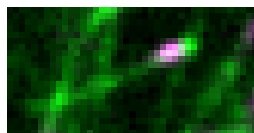

Supplement: 12870_2017_987_MOESM11_ESM.pdf [file 12870_2017_987_MOESM11_ESM.pdf]
